# Supplementary material for: Facile fabrication of electrospun g-C3N4/Bi12O17Cl2/poly(acrylonitrile-co-maleic acid) heterojunction nanofibers for boosting visible-light catalytic ofloxacin degradation
Source: Royal Society of Chemistry journal article supplement (doi:10.1039/d1nj05928a), 2022-01-01
Supplement: d1nj05928a1.pdf [file d1nj05928a1.pdf]

## Supplementary Materials

Facile fabrication of electrospun g-  
 $C_3N_4/Bi_{12}O_{17}Cl_2$ /poly(acrylonitrile-co-maleic acid) heterojunction  
nanofibers for boosting visible-light catalytic ofloxacin degradation

Zhujun Huang, Dongying Zhu, Haiyan Wang, Jinhua Luo, Chenxi Zhao, Fuyou Du\*

<sup>a</sup>College of Biological and Environmental Engineering, Changsha University,  
Changsha 410022, China

\* Corresponding author: F. Du

Tel.: +86-731-84261506

Fax.: +86-731-84261382

E. mail: dufu2005@126.com (F. Du)

jhluo@ccsu.cn (L. Luo)

### **Preparation of poly(acrylonitrile-co-maleic acid)**

Poly(acrylonitrile-co-maleic acid) (PANCMA) was synthesized by using in situ polymerization of acrylonitrile and maleic anhydride. Briefly, maleic anhydride (7.407 g), acrylonitrile (13.15 mL,  $\rho = 0.8060$  g/L), and deionized water (20 mL) were poured into a three-necked flask, then the mixed solution pH was adjusted to 2.0 with dilute sulfuric acid and heated to 60 °C under magnetic stirring. After the temperature was equilibrated at 60 °C,  $K_2S_2O_8$  (0.136 g) and  $Na_2SO_3$  (0.0766 g) were added and reacted for 3 h with the protection of  $N_2$ . The resulting polymer was taken out and washed with water and ethanol for several times, respectively, and then filtered, dried at 60 °C in a vacuum oven for 12 h.

## Tables

Table S1 Calibration curve, linearity, linear regression coefficient ( $R^2$ ), and limit of detection (LOD) for determination of OFL by HPLC-UV method

| Compound | Calibration curve  | Linearity<br>(ng/mL) | $R^2$  | LOD<br>(ng/mL) | RSD<br>(%) |
|----------|--------------------|----------------------|--------|----------------|------------|
| OFL      | $y=89.086x-419.16$ | 5-1000               | 0.9992 | 2.13           | 1.52       |

*Note:* The limit of detection (LOD) was evaluated on the basis of a signal-to-noise ratio of 3.

Table S2 Results of N<sub>2</sub> adsorption-desorption characteristics on the E-spun PANCMA and g-C<sub>3</sub>N<sub>4</sub>/Bi<sub>12</sub>O<sub>17</sub>Cl<sub>2</sub>/PANCMA nanofibers

| Property     | Parameter                                                                                                                  | PANCM     | g-C <sub>3</sub> N <sub>4</sub> /                        |
|--------------|----------------------------------------------------------------------------------------------------------------------------|-----------|----------------------------------------------------------|
|              |                                                                                                                            | A         | Bi <sub>12</sub> O <sub>17</sub> Cl <sub>2</sub> /PANCMA |
| Surface Area | Single point surface area at P/Po (m <sup>2</sup> /g)                                                                      | 24.9760   | 5.3186                                                   |
|              | BET Surface Area (m <sup>2</sup> /g)                                                                                       | 25.8848   | 5.3938                                                   |
|              | t-Plot External Surface Area (m <sup>2</sup> /g)                                                                           | 26.1887   | 1.6485                                                   |
| Area         | BJH Adsorption cumulative surface area of pores between 1.7000 nm and 300.0000 nm diameter (m <sup>2</sup> /g)             | 25.036    | 2.541                                                    |
|              | BJH Desorption cumulative surface area of pores between 1.7000 nm and 300.0000 nm diameter (m <sup>2</sup> /g)             | 46.0199   | 3.2018                                                   |
| Pore Volume  | Single point adsorption total pore volume of pores less than 130.9985 nm diameter at P/Po=0.985000000 (cm <sup>3</sup> /g) | 0.134838  | 0.013393                                                 |
|              | t-Plot micropore volume (cm <sup>3</sup> /g)                                                                               | -0.000190 | 0.002134                                                 |
|              | BJH Adsorption cumulative volume of pores between 1.7000 nm and 300.0000 nm width (cm <sup>3</sup> /g)                     | 0.138315  | 0.016434                                                 |
|              | BJH Desorption cumulative volume of pores between 1.7000 nm and 300.0000 nm diameter (cm <sup>3</sup> /g)                  | 0.140227  | 0.018148                                                 |
| Pore Size    | Adsorption average pore width (4V/A by BET) (nm)                                                                           | 20.83660  | 9.93196                                                  |
|              | BJH Adsorption average pore width (4V/A) (nm)                                                                              | 22.0990   | 25.8736                                                  |
|              | BJH Desorption average pore width (nm)                                                                                     | 12.1884   | 22.6716                                                  |

TableS 3 Comparison of the developed g-C<sub>3</sub>N<sub>4</sub>/Bi<sub>12</sub>O<sub>17</sub>Cl<sub>2</sub>/PANCMA nanofibers with the other reported photocatalytical materials for removal of OFL

| Materials                                                                                                   | Removal mode               | Time (min) | Removal efficiency | Cycle times | Referen cev |
|-------------------------------------------------------------------------------------------------------------|----------------------------|------------|--------------------|-------------|-------------|
| MoO <sub>3</sub> /Ag/g-C <sub>3</sub> N <sub>4</sub>                                                        | Photocatalytic degradation | 100        | 89%                | 7           | [31]        |
| UiO-67/CdS/rGO                                                                                              | Photocatalytic degradation | 30         | 93.4%              | 4           | [32]        |
| Bi <sub>2</sub> MoO <sub>6</sub> -rGO-TiO <sub>2</sub>                                                      | Photocatalytic degradation | 120        | 92.3%              | 5           | [33]        |
| BiVO <sub>4</sub> /g-C <sub>3</sub> N <sub>4</sub> /NiFe <sub>2</sub> O <sub>4</sub>                        | Photocatalytic degradation | 20         | 93.8%              | 5           | [34]        |
| Bi <sub>2</sub> WO <sub>6</sub> /Fe <sub>3</sub> O <sub>4</sub> /biochar                                    | Photocatalytic degradation | 60         | 83.1%              | 5           | [35]        |
| ZnO/Bi <sub>2</sub> MoO <sub>6</sub>                                                                        | Dark adsorption            | 30         | 93%                | 5           | [36]        |
|                                                                                                             | Photocatalytic degradation | 90         |                    |             |             |
| g-C <sub>3</sub> N <sub>4</sub> /NH <sub>2</sub> -MIL-88B(Fe)                                               | Dark adsorption            | 30         | 96.5%              | 3           | [37]        |
|                                                                                                             | Photocatalytic degradation | 150        |                    |             |             |
| UiO-66/wood composite                                                                                       | Dark adsorption            | 90         | 80.96%             | 4           | [38]        |
|                                                                                                             | Photocatalytic degradation | 270        |                    |             |             |
| E-spun g-C <sub>3</sub> N <sub>4</sub> /Bi <sub>12</sub> O <sub>17</sub> Cl <sub>2</sub> /PANCMA nanofibers | Dark adsorption            | 6          | 94.8%              | 15          | This work   |
|                                                                                                             | Photocatalytic degradation | 20         |                    |             |             |

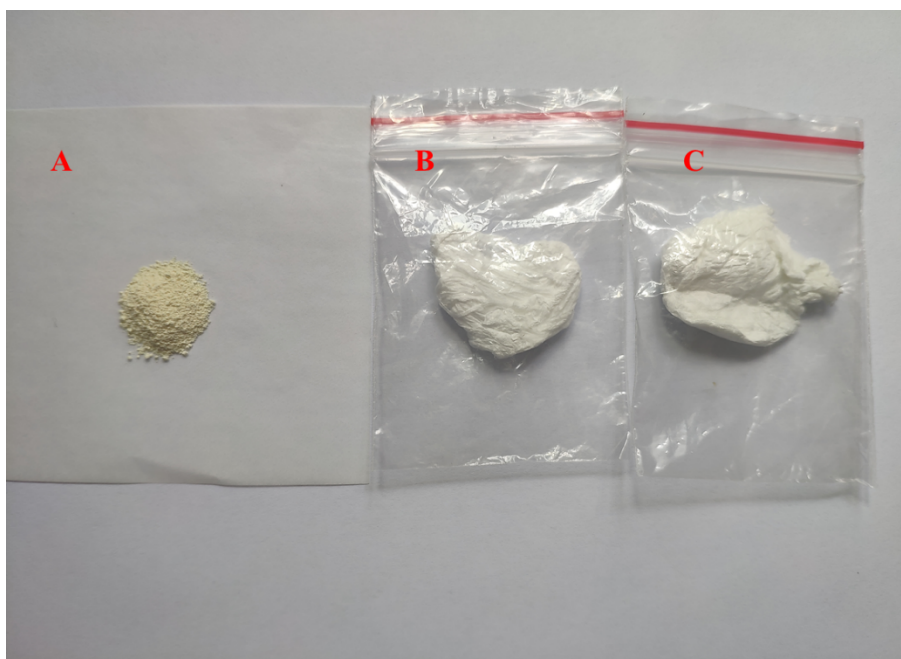

**Figure S1** The appearance of g-C<sub>3</sub>N<sub>4</sub>/Bi<sub>12</sub>O<sub>17</sub>Cl<sub>2</sub> (A), E-spun PANCMA (B) and g-C<sub>3</sub>N<sub>4</sub>/Bi<sub>12</sub>O<sub>17</sub>Cl<sub>2</sub>/PANCMA (C) nanofibers

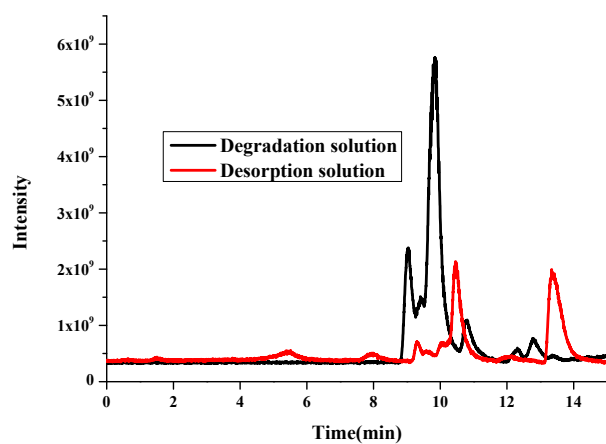

**Figure S2** Typical total ion chromatograms of desorption and degradation solution by photocatalytic degradation of OFL adsorbed on E-spun g- $C_3N_4/Bi_{12}O_{17}Cl_2(1:3)/PANCMA$  nanofibers

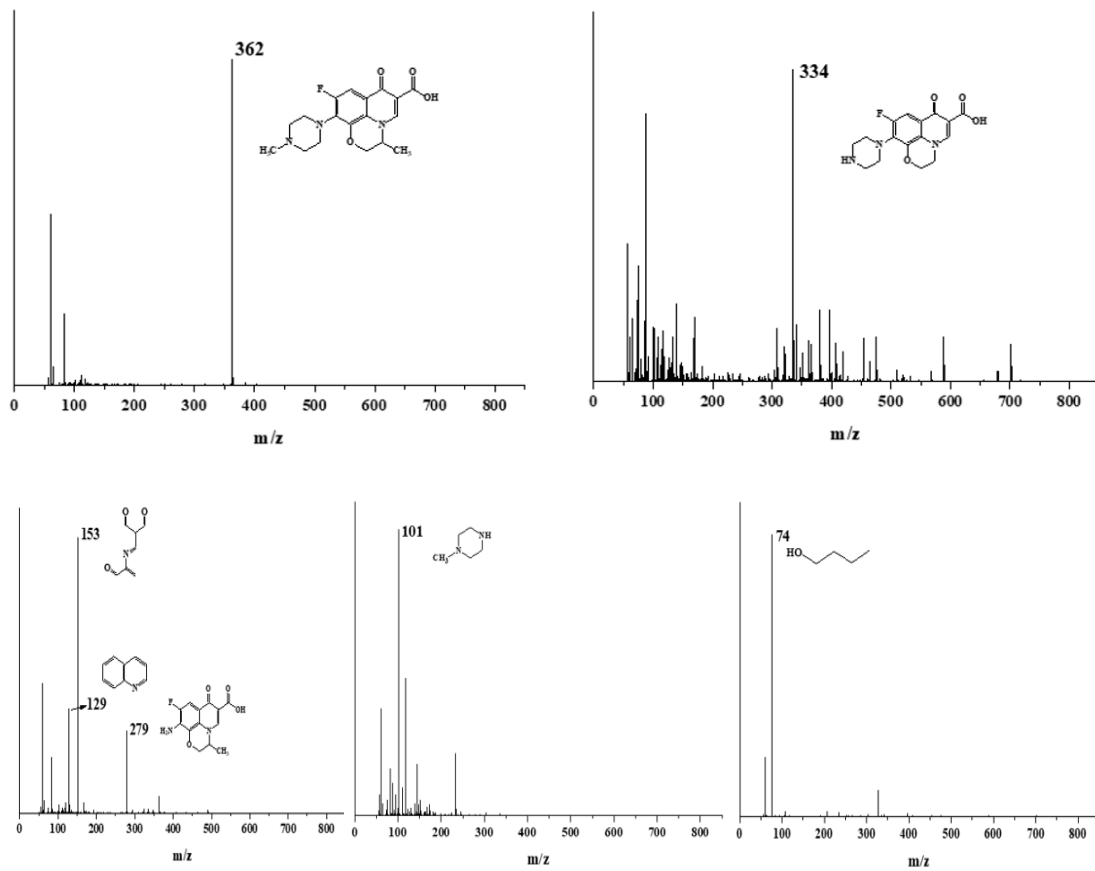

**Figure S3** Typical characteristic MS fragment peaks of degradation products of OFL



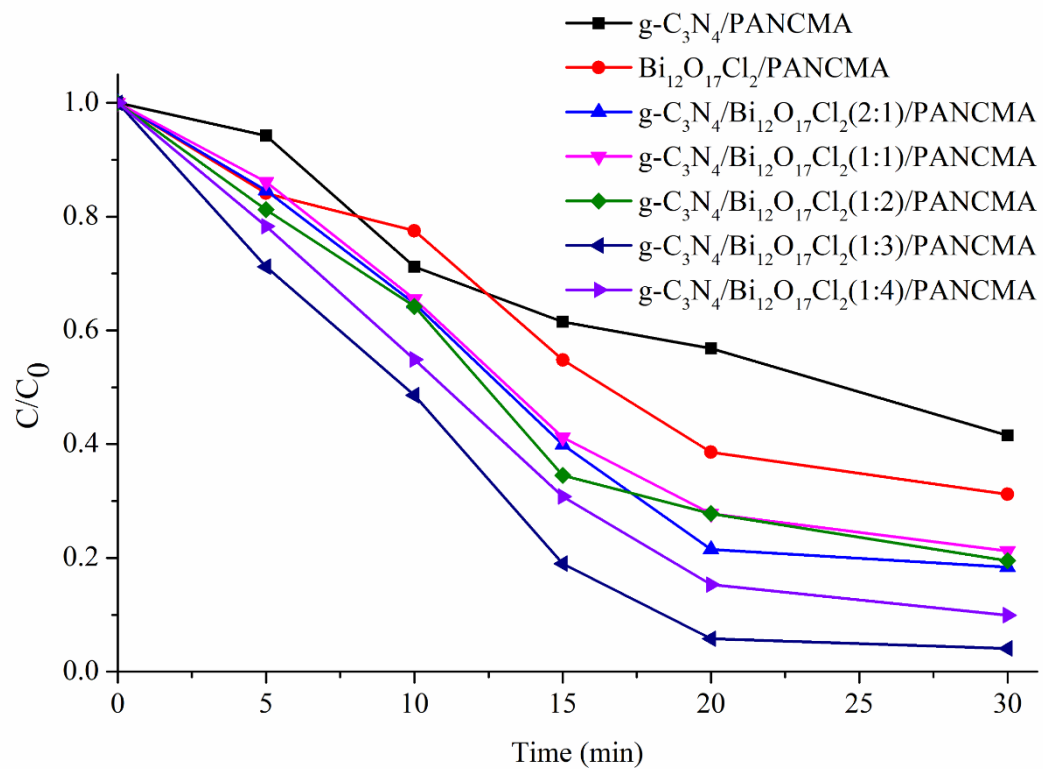

Figure S4 Effect of different photocatalytical materials on the OFL degradation

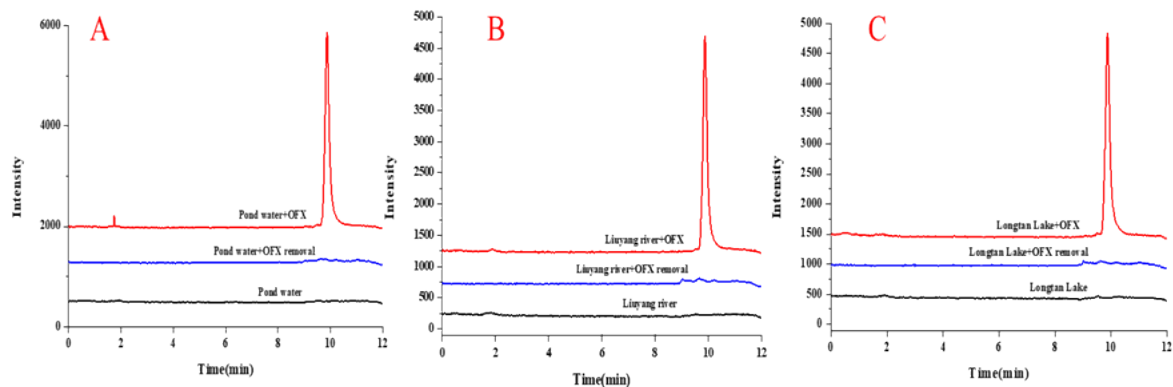

**Figure S5** Typical chromatograms of pond water (A), river water (B), and lake water (C) before and after degradation (20 min of light irradiation) via E-spun  $g\text{-C}_3\text{N}_4/\text{Bi}_{12}\text{O}_{17}\text{Cl}_2(1:3)/\text{PANCMA}$  nanofibers. The spiked OFL concentration was 100 ng/mL.

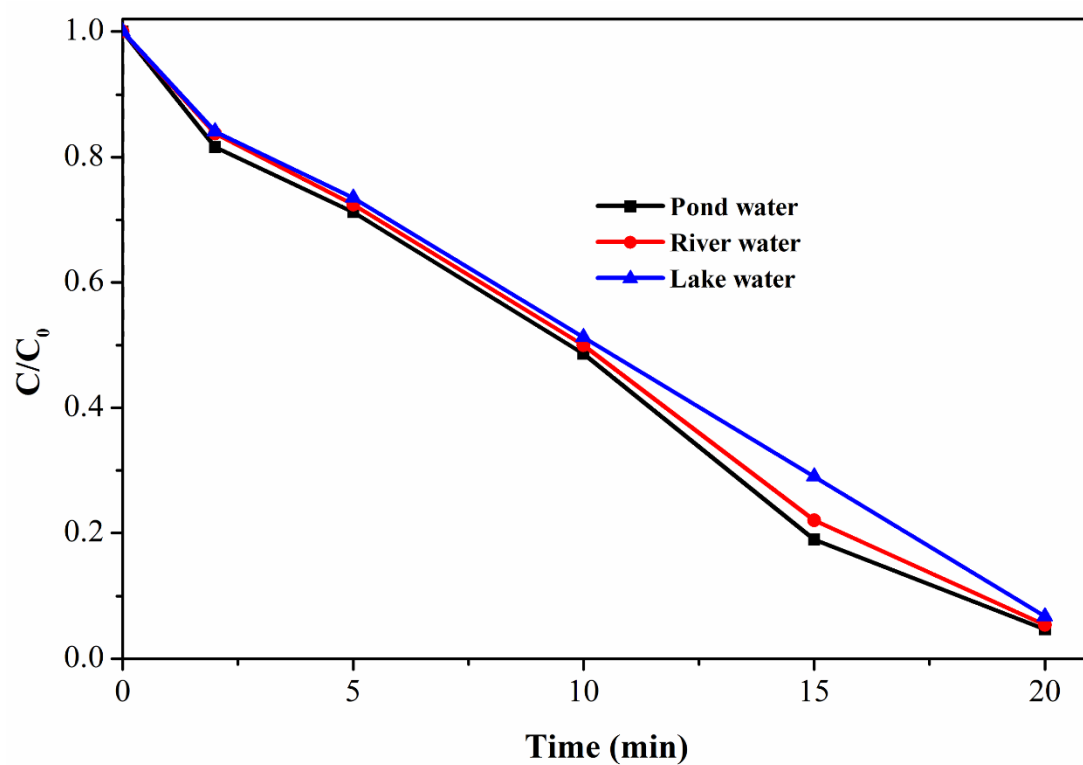

**Figure S6** Photocatalytic degradation of OFL (50 mL, 100 ng/mL) in various water samples over E-spun  $g\text{-C}_3\text{N}_4/\text{Bi}_{12}\text{O}_{17}\text{Cl}_2(1:3)/\text{PANCMA}$  nanofibers

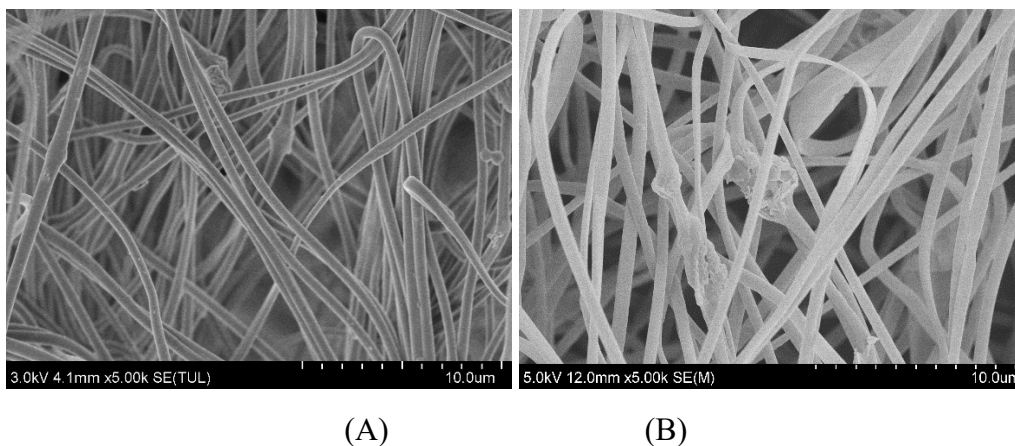

**Figure S7** SEM images of E-spun  $g\text{-C}_3\text{N}_4/\text{Bi}_{12}\text{O}_{17}\text{Cl}_2(1:3)/\text{PANCMA}$  nanofibers (A) before and (B) after consecutive 20 cycle times of adsorption/photocatalytic degradation process

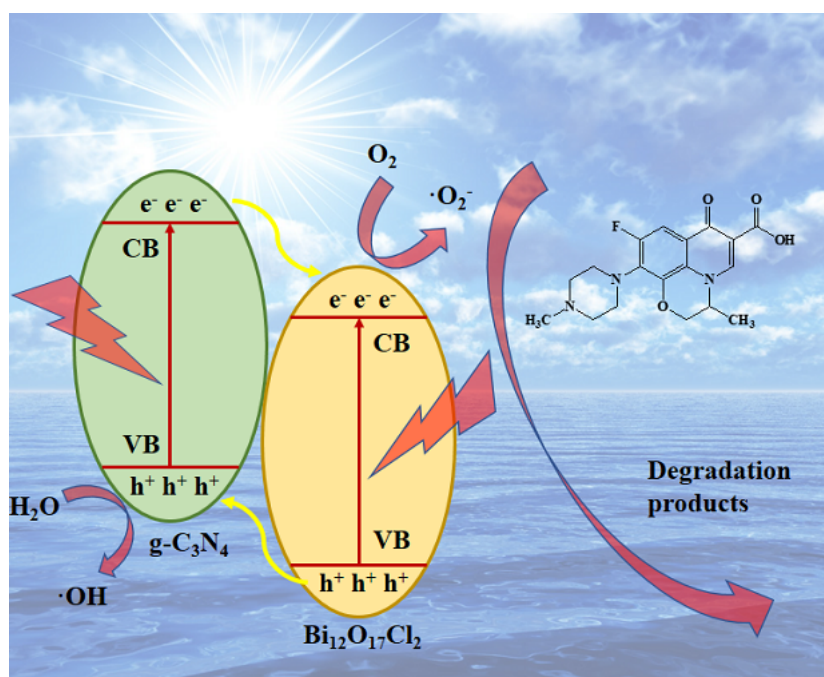

**Scheme 1** Possible photocatalytic degradation mechanism of OFL over the E-spun  $g\text{-C}_3\text{N}_4/\text{Bi}_{12}\text{O}_{17}\text{Cl}_2(1:3)/\text{PANCMA}$  nanofibers
